# Supplementary material
Source: PubMed Central journal article supplement (PMC5942524)

Supplemental Figure A3. Canonical Pathway: *Hepatic Cholestasis*.

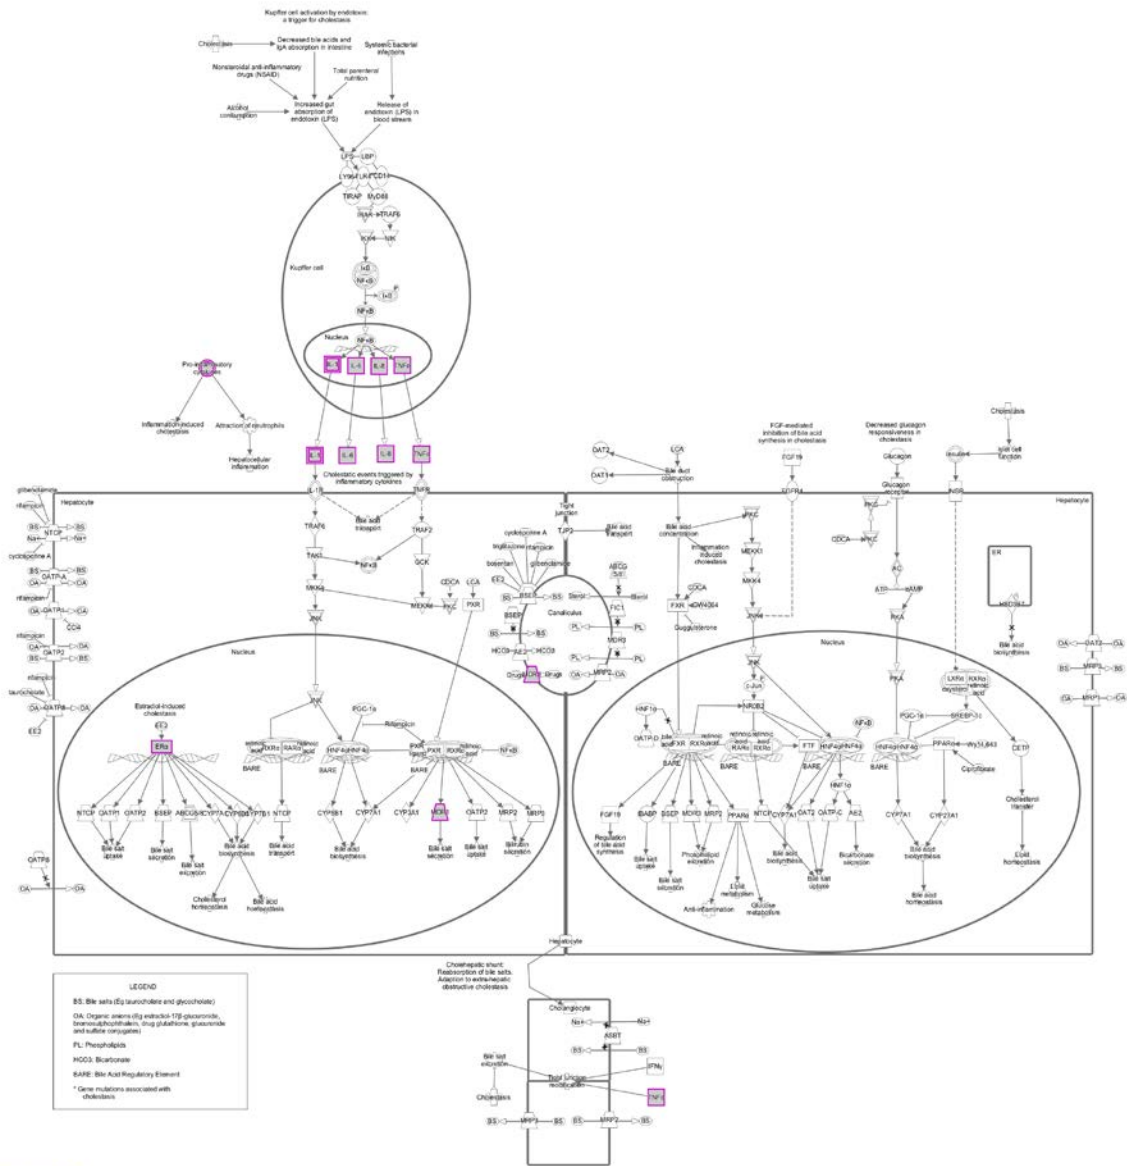

Supplemental Figure A4. Canonical Pathway: *Role of Cytokines in Mediating Communication between Immune Cells.*

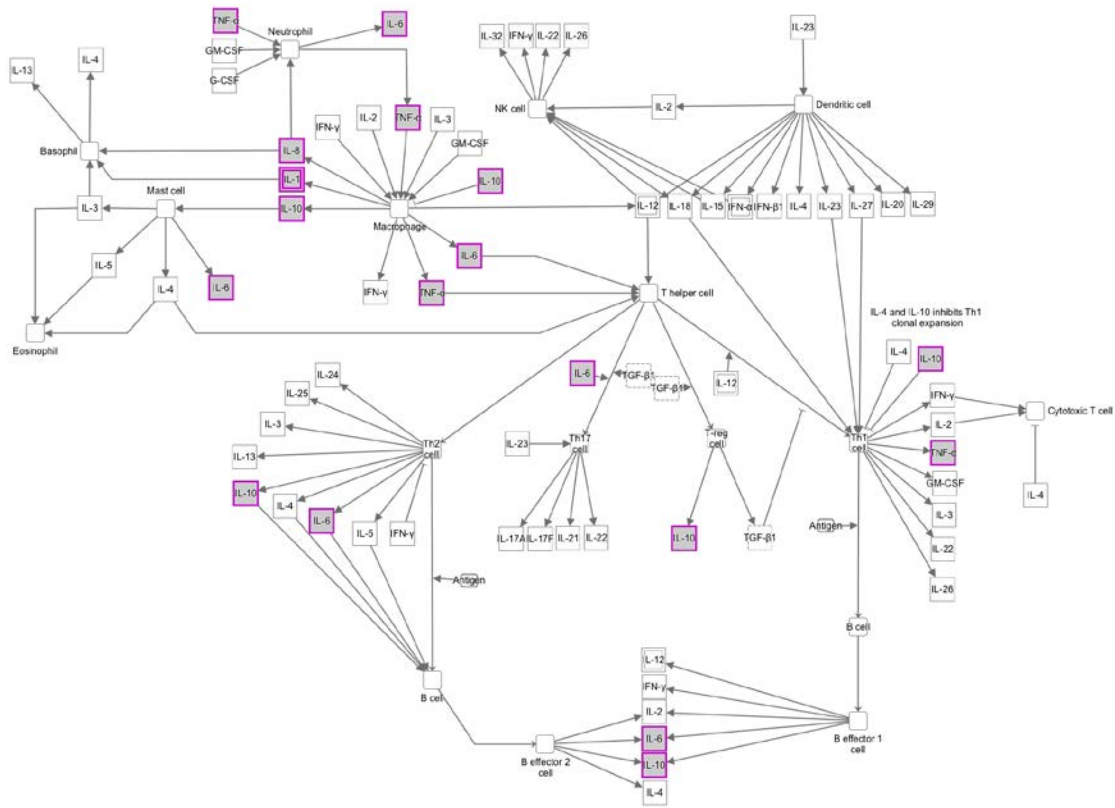

Supplemental Figure A5. Canonical Pathway: *IL6* Signaling.

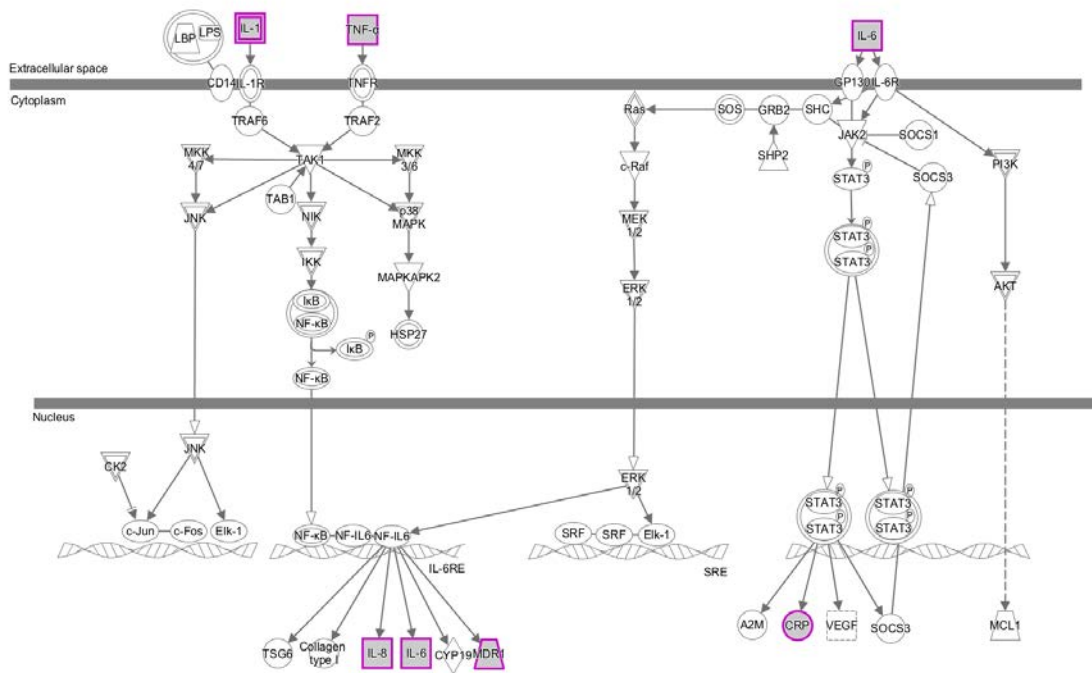

Supplement: conley_17070087_toSage_supplFigs.pdf [file conley_17070087_toSage_supplFigs.pdf]
